# Supplementary material for: The metastatic suppressor NDRG1 inhibits EMT, migration and invasion through interaction and promotion of caveolin-1 ubiquitylation in human colorectal cancer cells
Source: PubMed Central journal article supplement — Oncogene. 2017 Mar 27;36(30):4323–35. doi: 10.1038/onc.2017.74 (PMC5537633; doi:10.1038/onc.2017.74), 2017-03-27
Supplement: onc201774x1.pdf [file onc201774x1.pdf]

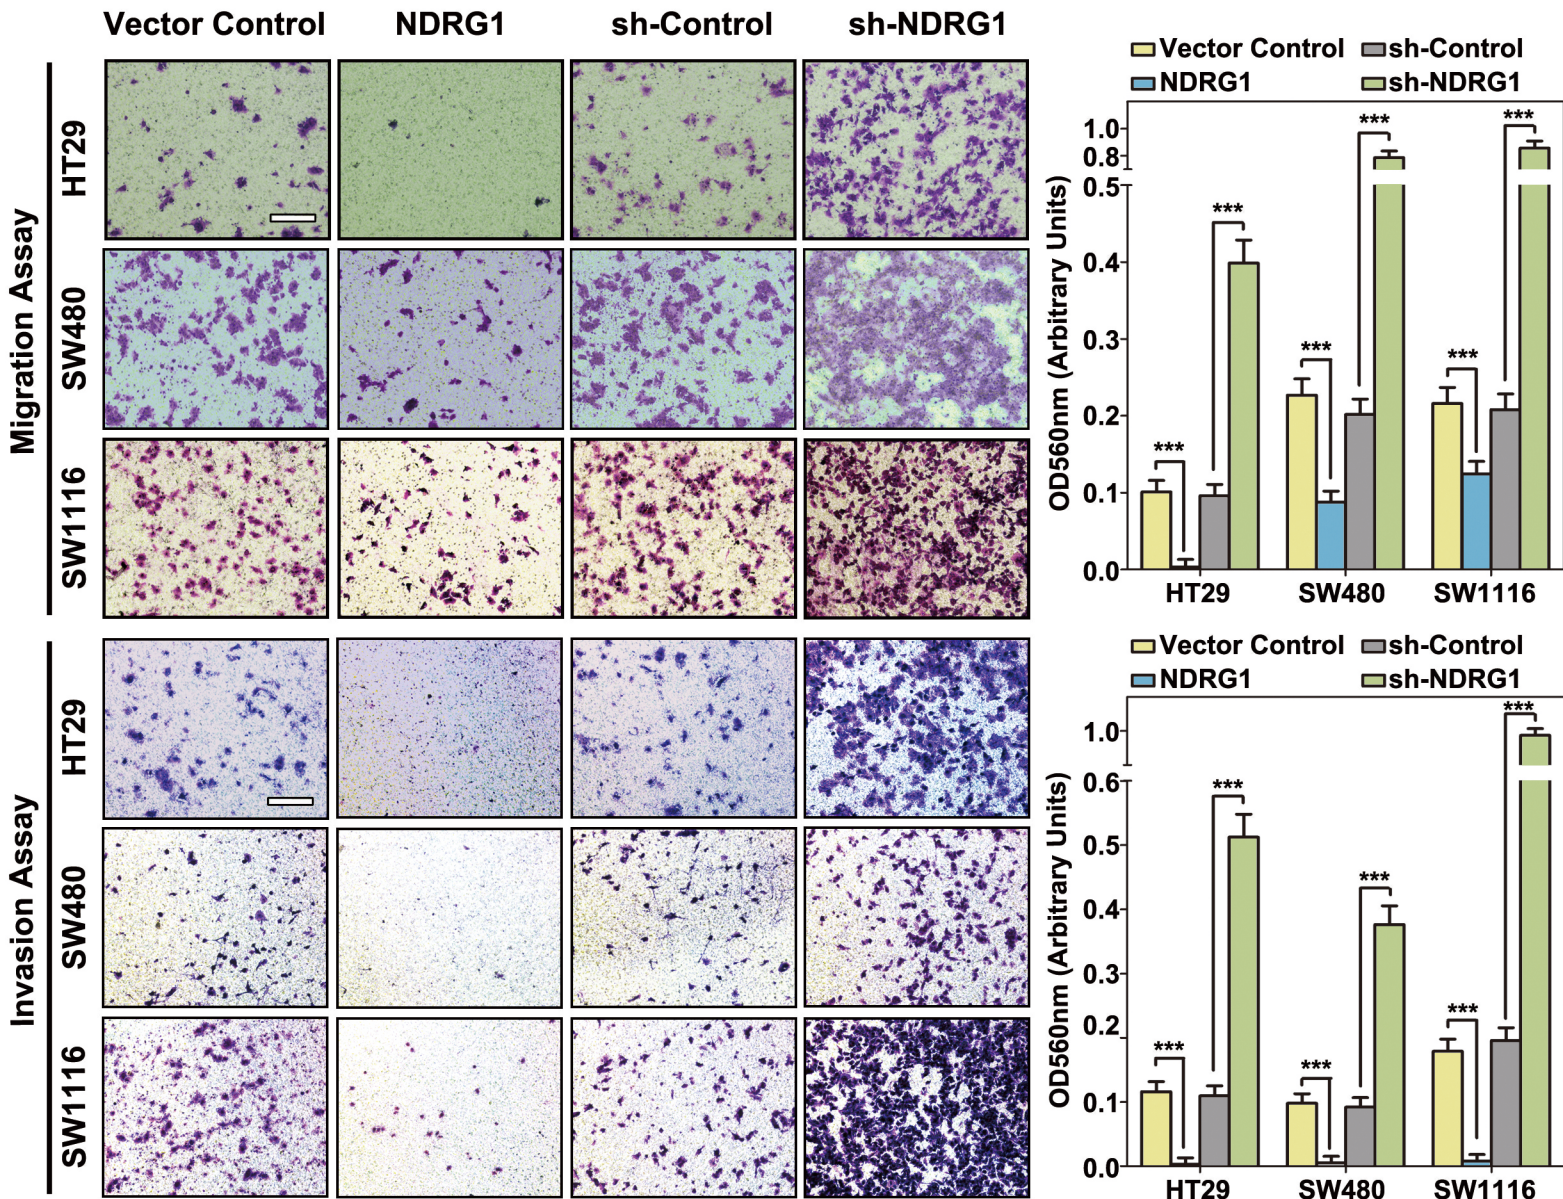

**Supplementary Figure 1. Transwell Assay result for HT29, SW480 and SW1116 cell lines after NDRG1 overexpressing and knockdown. Data represent the means  $\pm$  SD from three independent experiments. scale bar: 50  $\mu$ m.**
