# Supplementary material for: The metastatic suppressor NDRG1 inhibits EMT, migration and invasion through interaction and promotion of caveolin-1 ubiquitylation in human colorectal cancer cells
Source: PubMed Central journal article supplement — Oncogene. 2017 Mar 27;36(30):4323–35. doi: 10.1038/onc.2017.74 (PMC5537633; doi:10.1038/onc.2017.74), 2017-03-27
Supplement: onc201774x3.pdf [file onc201774x3.pdf]

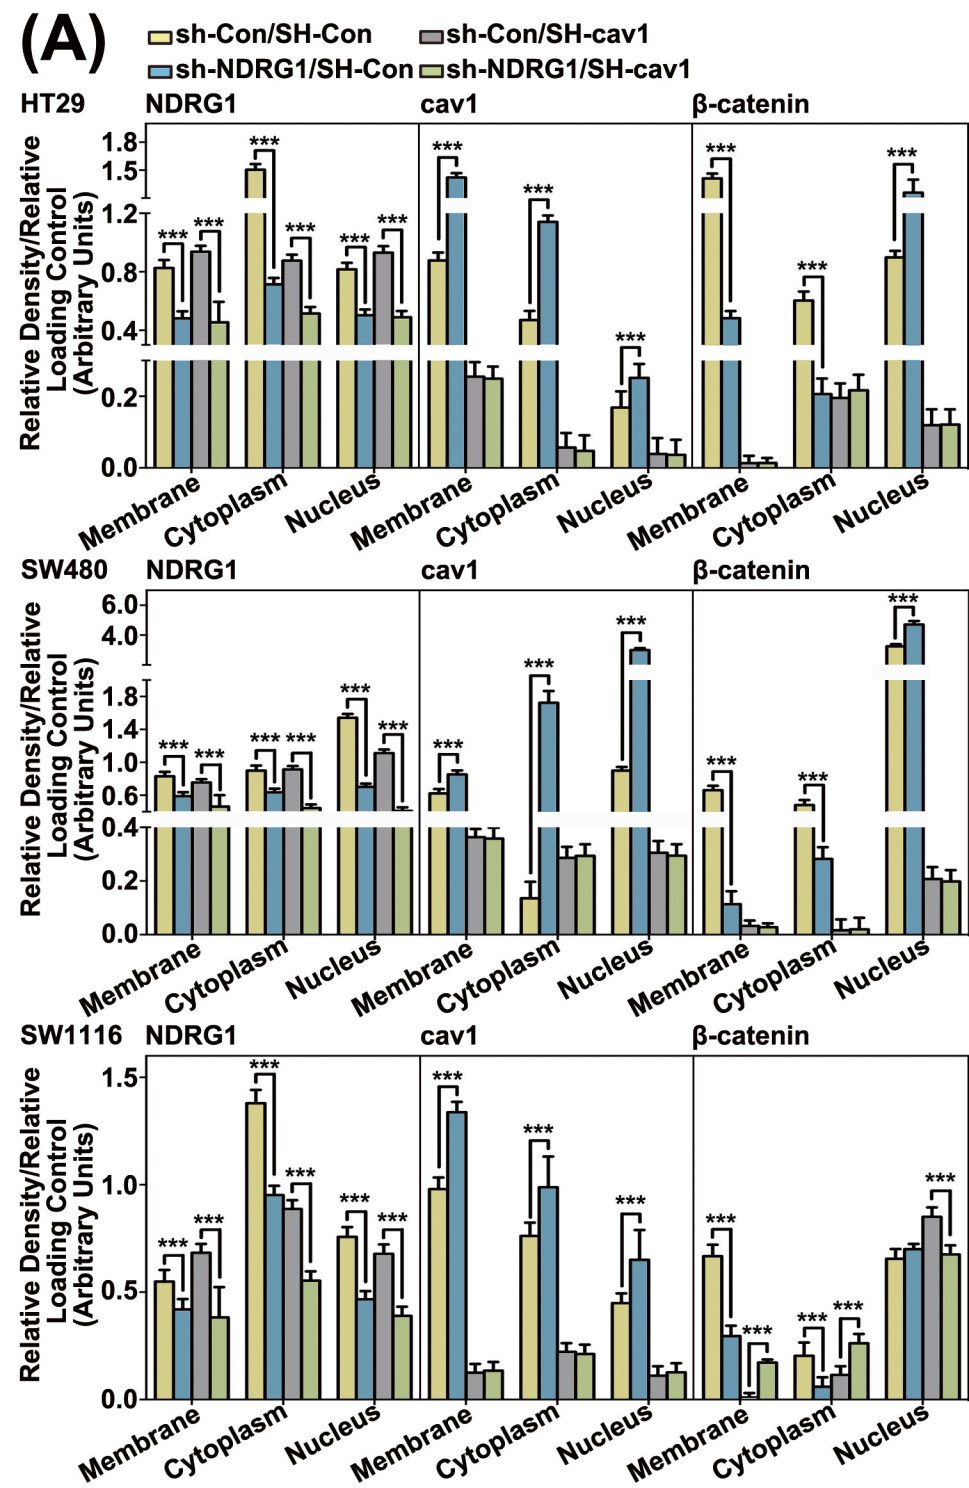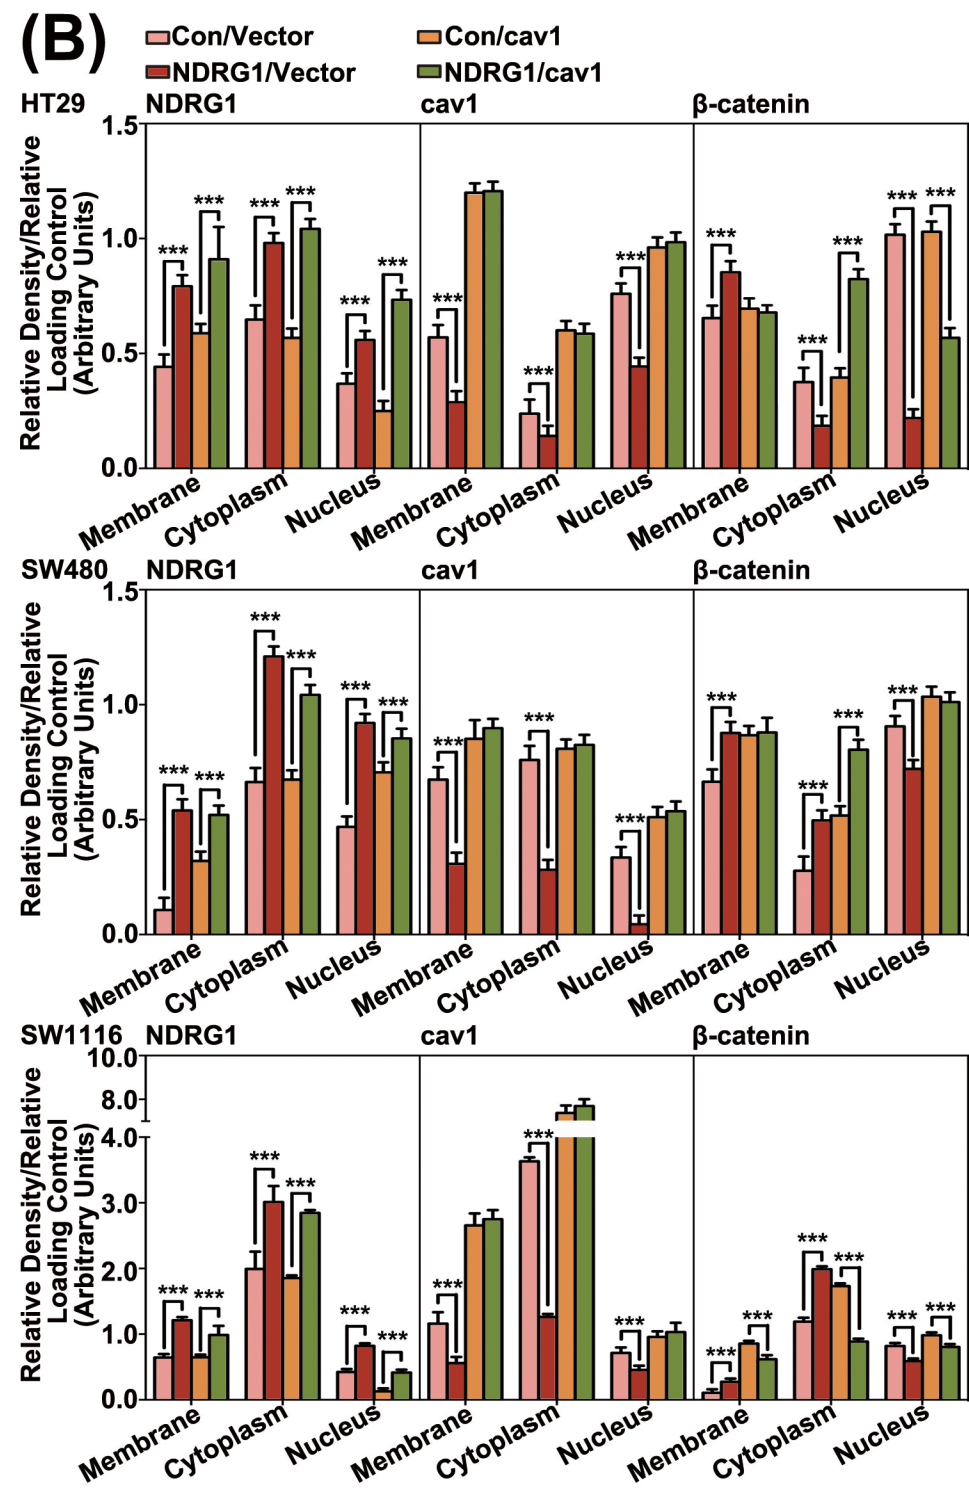

Supplementary Figure 3: Semi-quantification for supplementary figure 2. \*\*\*,  $p < 0.001$ ; \*\*,  $p < 0.01$ ; \*,  $p < 0.05$ , comparing to relative control.
