# Supplementary material for: The metastatic suppressor NDRG1 inhibits EMT, migration and invasion through interaction and promotion of caveolin-1 ubiquitylation in human colorectal cancer cells
Source: PubMed Central journal article supplement — Oncogene. 2017 Mar 27;36(30):4323–35. doi: 10.1038/onc.2017.74 (PMC5537633; doi:10.1038/onc.2017.74), 2017-03-27
Supplement: onc201774x4.pdf [file onc201774x4.pdf]

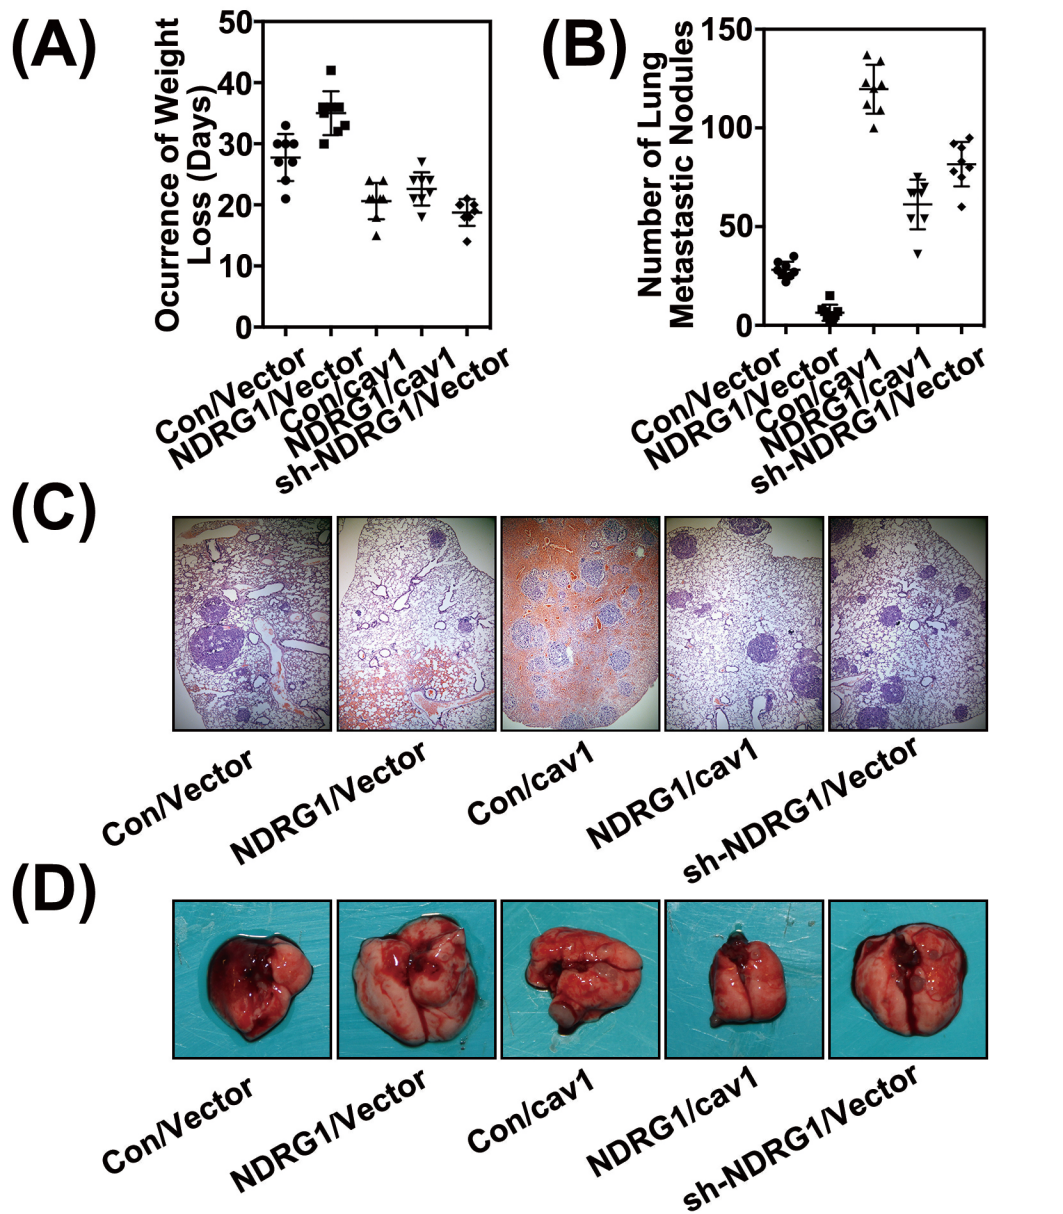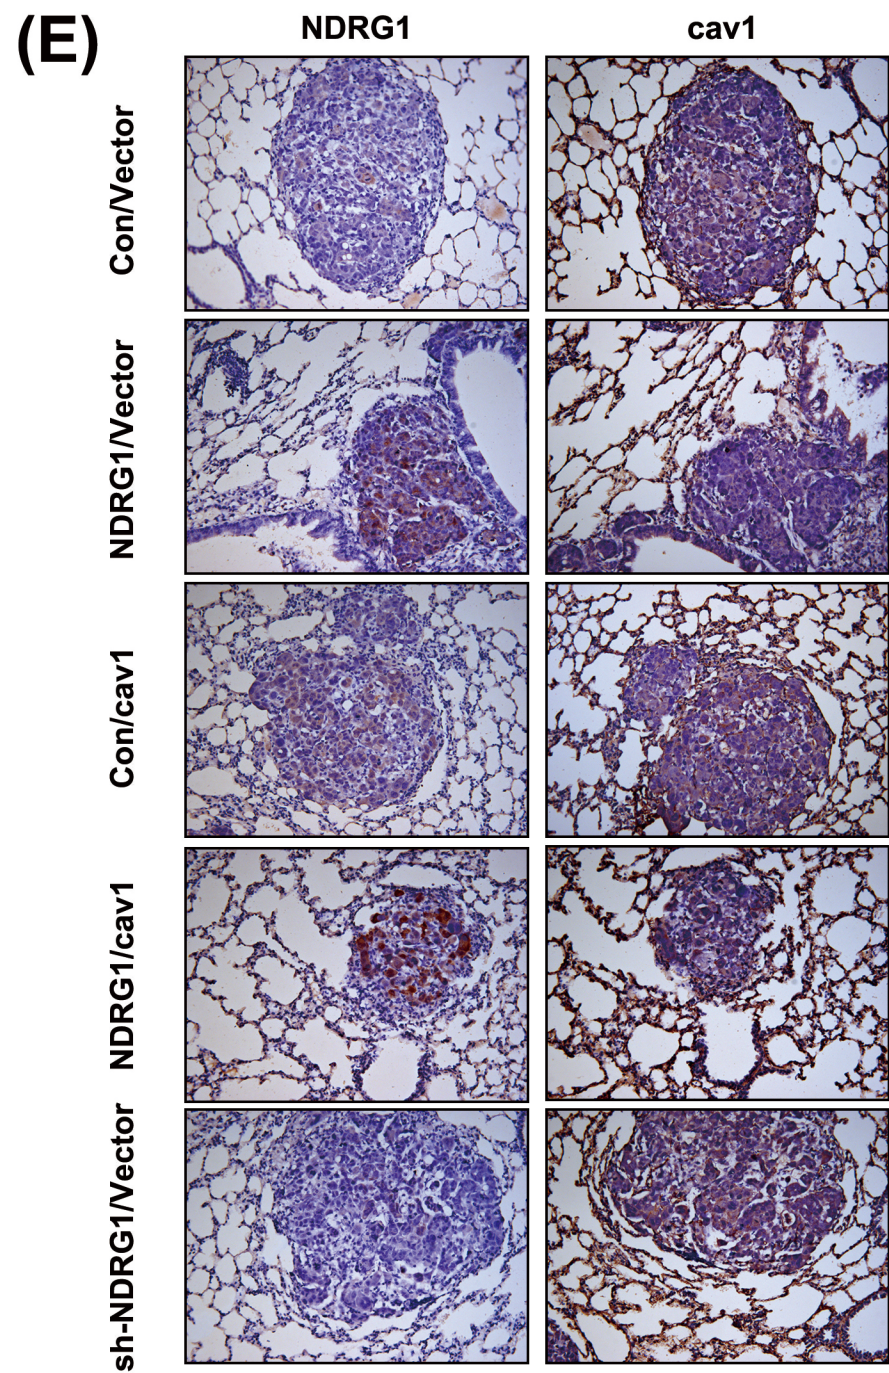

Supplementary Figure 4: Animal experiment for NDRG1 and cav1 overexpression cells. (A) Occurrence of weight loss, representing the occurrence of metastasis; (B) Number of lung metastatic nodules after harvested; (C) HE staining for lung metastatic nodules, Magnification: 40 $\times$ ; (D) Gross appearance of metastatic lung tissues. (E) IHC staining for NDRG1 and cav1 in harvested lung tissues, Magnification: 100 $\times$ .
